# Supplementary material
Source: Springer Nature journal article supplement (https://www.springermedizin.de/resource/supplementary/12913_2014_3466_MOESM2_ESM.pdf/9532916)
Supplement: MOESM2 [file 9532916]

## Additional file 2: Characteristics of included studies

**LEGEND:** N/A = Information not available from study publication; GPs = General Practitioners; <sup>a</sup>All information available in report(s) included; <sup>b</sup>848 questionnaires were returned, however 65 were uncompleted therefore response rate taken as 783; <sup>c</sup>Breakdown by subgroup not available; <sup>d</sup>5 records lost, leaving total functional sample size of 302; <sup>e</sup>Medical students excluded from peer-reviewed publication; <sup>f</sup>Total sampling frame of junior doctors not available; <sup>g</sup>Numbers given are for target sample: however, it is unclear whether response rate was 100%; <sup>h</sup>Conference abstract only, not full length paper <sup>i</sup>Also contains data on Thai nurses published in Blauuw *et al*, 2010; <sup>j</sup>Nurses and midwives and nursing/midwifery students analysed as one group in report (33), but only nurses and nursing students included in peer-reviewed publication and analysed as separate groups (34).

| Authors & earliest publication date | Peer-reviewed publication | Study Setting | Health worker cadre and type   | Sample size (total) | Survey mode <sup>a</sup>                                  | Response rate             | Study objective                                                                                                                                            |
|-------------------------------------|---------------------------|---------------|--------------------------------|---------------------|-----------------------------------------------------------|---------------------------|------------------------------------------------------------------------------------------------------------------------------------------------------------|
| Chomitz <i>et al</i> 1998 (1)       | No                        | Indonesia     | Medical students (final year)  | 585                 | Self-administered questionnaire supervised by researchers | N/A                       | To understand doctors' preferences regarding various possible incentives, in particular to attract them to rural or remote places                          |
| Gosden 2000 (2)                     | Yes                       | England       | Doctors (GPs)                  | 172                 | Self-administered postal questionnaire                    | 58.7% (172/293)           | To investigate GP preferences for practice and job characteristics, in order to understand what factors might improve GP recruitment in under-served areas |
| Scott 2001 (3)                      | Yes                       | UK            | Doctors (GPs)                  | 783                 | Self-administered postal questionnaire                    | 65% <sup>b</sup> 783/1206 | To investigate GPs' preferences for financial and non-financial incentives                                                                                 |
| Ubach <i>et al</i> 2003 (4)         | Yes                       | Scotland      | Doctors (hospital consultants) | 1793                | Self-administered postal questionnaire                    | 61.3% (1793/2923)         | To examine hospital consultants' preferences for various job characteristics to inform workforce policy                                                    |
| Wordsworth <i>et al</i> 2004 (5)    | Yes                       | Scotland      | Doctors (GPs)                  | 1292                | Self-administered postal questionnaire                    | 50.0% (1292/ 2574)        | To identify the relative value given by sessional GPs to various job characteristics, in order to inform issues on recruitment and retention of GPs        |
| Penn-Kekana <i>et al</i> 2005 (6)   | No                        | South Africa  | Nurses (maternity)             | 147                 | Self-administered paper-based questionnaire               | N/A                       | To explore the relative importance of various job characteristics on nurses' decisions about where to work                                                 |
| Scott <i>et al</i> 2007 (7)         | Yes                       | Scotland      | Pharmacists (community)        | 914                 | Self-administered postal questionnaire                    | 56.4% (914/1621)          | To examine the preferences of community pharmacists for existing and potential new roles in                                                                |

|                                    |                  |                                   |                                                            |                                    |                                                                               |                                   | primary care                                                                                                                                   |
|------------------------------------|------------------|-----------------------------------|------------------------------------------------------------|------------------------------------|-------------------------------------------------------------------------------|-----------------------------------|------------------------------------------------------------------------------------------------------------------------------------------------|
| Mangham and Hanson 2008 (8)        | Yes              | Malawi                            | Nurses                                                     | 107                                | N/A                                                                           | 97.3% (107/110)                   | To determine the range and relative importance of various factors that affect nurses' job choices in the public sector                         |
| Hanson and Jack 2008 (9, 10)       | Yes              | Ethiopia                          | Doctors<br>Nurses                                          | 283<br>642<br><b>(925)</b>         | Interviewer-administered paper-based questionnaire                            | 70.7% (219/283)<br>N/A for nurses | To estimate the effects of possible policy interventions to improve the supply of doctors and nurses in rural areas                            |
| Kolstad 2008 (11, 12)              | Yes              | Tanzania                          | Trainee clinical officers (final year)                     | 307                                | Self-administered paper-based questionnaire supervised by researchers         | 96% (307/320)                     | To estimate clinical officers' job preferences in order to understand how rural jobs can be made more attractive                               |
| Blaauw <i>et al</i> 2010 (13)      | Yes              | Kenya<br>South Africa<br>Thailand | Nursing students (final year)                              | 345<br>377<br>342<br><b>(1064)</b> | Self-administered paper-based questionnaire supervised by researchers         | 74.5% (1064/1429)                 | To determine the relative effectiveness of financial and non-financial strategies to increase nurse recruitment to rural areas                 |
| Kruk <i>et al</i> 2010 (14)        | Yes              | Ghana                             | Medical students (fourth year)                             | 302                                | Computer-assisted, self-administered questionnaire, supervised by researchers | 99.0% (307/310) <sup>d</sup>      | To investigate the job attributes that influence medical students' preferences for rural job postings                                          |
| Vujicic <i>et al</i> 2010 (15)     | No               | Liberia                           | Nurses (various including nurse anaesthetist and midwives) | 197 <sup>c</sup>                   | Interviewer-administered, paper-based questionnaire                           | N/A                               | To provide evidence for policy options to retain nurses in rural posts                                                                         |
| Vujicic <i>et al</i> 2010 (16, 17) | Yes <sup>e</sup> | Vietnam                           | Doctors<br>Medical students (final year)                   | 292<br>105<br><b>(397)</b>         | Interviewer-administered, paper-based questionnaire                           | N/A                               | To investigate the preferences of doctors and medical students for rural posts in order to support the development of rural retention policies |
| Sivey <i>et al</i> 2010 (18, 19)   | Yes              | Australia                         | Doctors (junior i.e. not entered specialist training)      | 532                                | Self-administered postal paper-based or online questionnaire                  | N/A <sup>f</sup>                  | To examine the preferences of junior doctors who have not yet entered a specialist training program for different attributes of specialties    |

|                                          |                  |                                               |                                                                                                                         |                                                |                                                                                                                            |                                                                            |                                                                                                                                                       |
|------------------------------------------|------------------|-----------------------------------------------|-------------------------------------------------------------------------------------------------------------------------|------------------------------------------------|----------------------------------------------------------------------------------------------------------------------------|----------------------------------------------------------------------------|-------------------------------------------------------------------------------------------------------------------------------------------------------|
| Bundeth <i>et al</i><br>2011<br>(20, 21) | Yes              | Cambodia                                      | Medical students<br>Nursing students<br>Midwifery students<br>(all final year)                                          | 82<br>170<br>184<br><b>(436)</b>               | Self-administered paper-based questionnaire supervised by researchers                                                      | N/A <sup>9</sup>                                                           | To explore the financial and non-financial incentives required to post new clinical graduates to remote and rural areas                               |
| Lagarde <i>et al</i><br>2011<br>(22)     | No               | Mali                                          | Doctors<br>Medical students<br>(final year)<br>Midwives<br>Midwifery students<br>(final year)                           | 116<br>114<br>74<br>102<br><b>(396)</b>        | Self-administered paper-based questionnaire supervised by researchers                                                      | N/A                                                                        | To investigate the effect of various policy incentives to attract doctors and midwives into rural and periurban areas                                 |
| Lagarde <i>et al</i><br>2011<br>(23)     | Yes              | Thailand                                      | Doctors<br>( $< 3$ years graduated in rural service)                                                                    | 198                                            | Researchers explained questionnaire in person, then participants asked to self-administer questionnaire and return by post | 63.3%<br>(198/313)                                                         | To measure the preferences of junior doctors for incentives associated with rural/urban jobs                                                          |
| Rockers <i>et al</i><br>2011<br>(24, 25) | Yes              | Uganda                                        | Medical students<br><br>Nursing students<br><br>Pharmacy students<br>Laboratory technician students<br>(all final year) | 246<br><br>132<br><br>50<br>57<br><b>(485)</b> | Computer-assisted, self-administered questionnaire supervised by researchers                                               | 95.0%<br>(246/259)<br>85.2%<br>(132/155)<br>98.0% (50/51)<br>85.1% (57/67) | To investigate the preferences of trainee health workers for job attributes to aid recruitment and retention strategies in rural areas                |
| Rao <i>et al</i><br>2012<br>(26, 27)     | Yes <sup>h</sup> | India (Andhra Pradesh and Uttarakhand states) | Doctors<br>Medical students<br>(final year)<br>Nurses<br>Nursing students<br>(final year)                               | 222<br>163<br>238<br>145<br><b>(768)</b>       | Self-administered paper-based questionnaire supervised by researchers                                                      | N/A                                                                        | To examine the effect of monetary and non-incentives on job choices in order to improve recruitment in rural areas                                    |
| Lagarde <i>et al</i><br>2012<br>(28)     | Yes <sup>i</sup> | South Africa                                  | Nursing students<br>(final year)                                                                                        | 377                                            | N/A                                                                                                                        | 65.2%<br>(377/578)                                                         | To investigate the preferences of new nursing graduates for job opportunities in the public sector (rural and urban), the private sector or overseas. |

|                                                    |     |                                  |                                                                                                                                                                                                                            |                                                                             |                                                                        |                                                                                        |                                                                                                                                       |
|----------------------------------------------------|-----|----------------------------------|----------------------------------------------------------------------------------------------------------------------------------------------------------------------------------------------------------------------------|-----------------------------------------------------------------------------|------------------------------------------------------------------------|----------------------------------------------------------------------------------------|---------------------------------------------------------------------------------------------------------------------------------------|
| Miranda <i>et al</i> 2012 (29)                     | Yes | Peru                             | Doctors<br>(on short-term contracts)                                                                                                                                                                                       | 102                                                                         | Interviewer-administered questionnaire in person                       | N/A                                                                                    | To identify job attributes that would attract doctors to posts in rural areas                                                         |
| Huicho <i>et al</i> 2012 (30)                      | Yes | Peru                             | Nurses<br>Midwives<br>(both on short-term contracts)                                                                                                                                                                       | 205 <sup>c</sup>                                                            | Interviewer-administered questionnaire in person                       | N/A                                                                                    | To identify job attributes that would attract nurses and/or midwives to posts in rural areas                                          |
| Scott <i>et al</i> 2012 (31, 32)                   | No  | Australia                        | Doctors<br>(GPs)                                                                                                                                                                                                           | 3727                                                                        | Self-administered postal paper or online questionnaire                 | 16.8%<br>(3727/22137)                                                                  | To investigate preferences of GPs for rural locations                                                                                 |
| Jaskiewicz <i>et al</i> 2012 (33, 34) <sup>i</sup> | No  | Lao People's Democratic Republic | <b>Graduates:</b><br>Doctors<br>Medical assistants<br>Nurses<br><br>Midwives<br><br><b>Students:</b><br>Medical<br>(5 & 6 year)<br>Medical assistant<br>(1 & 2 year)<br>Nursing<br>(All years)<br>Midwifery<br>(All years) | 105<br>90<br>249<br><br>40<br><br>329<br>280<br>256<br>105<br><b>(1454)</b> | Self-administered paper-based questionnaire, supervised by researchers | N/A<br>N/A<br>65.0%<br>(249/383)<br>N/A<br><br>N/A<br>N/A<br>62.7%<br>(256/408)<br>N/A | To investigate health worker preferences for potential attraction and retention strategies for postings in rural areas                |
| Ageyi-Baffour <i>et al</i> 2013 (35)               | Yes | Ghana                            | Midwifery students<br>(final year)                                                                                                                                                                                         | 238                                                                         | Computer-assisted, self-administered questionnaire                     | 79.8<br>(238/298)                                                                      | To understand what would motivate midwifery students to work in rural areas after graduation in order to develop an incentive package |
| Song <i>et al</i> 2013 (36)                        | Yes | China                            | Doctors<br>Nurses                                                                                                                                                                                                          | 282<br>235<br><b>(517)</b>                                                  | Self-administered supervised by researchers                            | 100%<br>(517/517)                                                                      | To investigate the job preferences of doctors and nurses working in primary care                                                      |

## References for Additional File 2

1. Chomitz K, Setiadi G, Azwar A, Ismail N, Widiyarti. What Do Doctors Want? Developing Incentives for Doctors to Serve in Indonesia's Rural and Remote Areas. Policy Research Working Paper Series No. 1888. Washington, D.C.: World Bank; 1998.
2. Gosden T, Bowler I, Sutton M. How do general practitioners choose their practice? Preferences for practice and job characteristics. *Journal of Health Services Research and Policy*. 2000;5:208-13.
3. Scott A. Eliciting GPs' preferences for pecuniary and nonpecuniary job characteristics. *Journal of Health Economics*. 2001;20:329-47.
4. Ubach C, Scott A, French F, Awramenko M, Needham G. What do hospital consultants value about their jobs? A discrete choice experiment. *British Medical Journal*. 2003;326:1432.
5. Wordsworth S, Skatun D, Scott A, French F. Preferences for general practice jobs: a survey of principals and sessional GPs. *Journal of General Practice*. 2004;54:740-6.
6. Penn-Kekana L, Blaauw D, San Tint K, Monareng D, Chege J. Nursing staff dynamics and implications for maternal health provision in public health facilities in the context of HIV/AIDS. Johannesburg: Centre for Health Policy, University of Witwatersrand; 2005.
7. Scott A, Bond C, Inch J, Grant A. Preferences of community pharmacists for extended roles in primary care: a survey and discrete choice experiment. *Pharmacoeconomics*. 2007;25:783-92.
8. Mangham L, Hanson K. Employment preferences of public sector nurses in Malawi: results from a discrete choice experiment. *Tropical Medicine and International Health*. 2008;13(12):1-9.
9. Hanson K, Jack W. Health worker preferences for job attributes in Ethiopia: Results from a discrete choice experiment. Washington, D.C.: World Bank; 2008.
10. Hanson K, Jack W. Incentives Could Induce Ethiopian Doctors And Nurses To Work In Rural Settings. *Health Affairs*. 2010;29(8):1452-60.
11. Kolstad JR. How to make rural jobs more attractive to health workers. Findings from a discrete choice experiment in Tanzania. Working Papers in Economics No 15/08, Bergen: Department of Economics, University of Bergen; 2008.
12. Kolstad J. How to make rural jobs more attractive to health workers. Findings from a discrete choice experiment in Tanzania. *Health Economics*. 2010;20(2):196-211.
13. Blaauw D, Erasmus E, Pagaiya N, Tangcharoensathien V, Mullei K, Mudhune S, et al. Policy interventions that attract nurses to rural areas: a multicountry discrete choice experiment. *Bulletin of the World Health Organization*. 2010;88:350-6.
14. Kruk M, Johnson J, Gyakobo M, Agyie-Baffour P, Asabir K, Kotha S, et al. Rural Practice Preferences among Medical Students in Ghana: a Discrete Choice Experiment. *Bulletin of the World Health Organization*. 2010;88:333-41.
15. Vujcic M, Alfano M, Ryan M, Sanford Wesse C, Brown-Annan J. Policy options to retain nurses in rural Liberia: Evidence from a discrete choice experiment. Washington, D.C.: World Bank; 2010.
16. Vujcic M, Alfano M, Shengeliac B, Witter S. Attracting Doctors and Medical Students to Rural Vietnam: Insights from a Discrete Choice Experiment. Washington, D.C.: World Bank; 2010.
17. Vujcic M, Shengelia B, Alfano M, Bui Thu H. Physician shortages in rural Vietnam: Using a labor market approach to inform policy. *Social Science & Medicine*. 2011;73:970-7.
18. Sivey P, Scott A, Witt J, Humphreys J, Joyce C. Why Junior Doctors Don't Want to Become General Practitioners: A Discrete Choice Experiment from the MABEL Longitudinal Study of Doctors. Melbourne Institute Working Paper No 17/10. Melbourne, University of Melbourne: 2010.
19. Sivey P, Scott A, Witt J, Joyce C, Humphreys J. Junior doctors' preferences for specialty choice. *Journal of Health Economics*. 2012;31:813-23.
20. Bundeth S, Neath N, Nognlak P, Sethea S. Incentives and the retention of health workers in rural and disadvantaged areas of Cambodia. CDRI Annual Development Review 2010-11. Phnom Penh: Cambodia Development Research Institute; 2011.

21. Bundeth S, Neath N, Nonglak P, Sethea S. Understanding rural health service in Cambodia: results of a discrete choice experiment. *Improving Health Sector Performance: Institutions, Motivations and Incentives*. Singapore: Institute of Southeast Asian Studies; 2011.
22. Lagarde M, Traore O, Juquois M, Lemiere C. Quelles politiques incitatives pour attirer le personnel de sante malien hors de Bamako? Resultats du questionnaire emploi DCE Mali. Washington, D.C.: World Bank; 2011.
23. Lagarde M, Pagaiya N, Tangchareonsathien V, Blaauw D. One size does not fit all: investigating doctors' stated preference heterogeneity for job incentives to inform policy in Thailand. *Health Economics*. 2013;22(12):1452-69.
24. Rockers P, Jaskiewicz W, Wurts L, Mgomella G. Determining Priority Retention Packages to Attract and Retain Health Workers in Rural and Remote Areas in Uganda. Washington, D.C.: *CapacityPlus*; 2011.
25. Rockers P, Jaskiewicz W, Wurts L, Kruk ME, Mgomella G, Ntalazi F, et al. Preferences for working in rural clinics among trainee health professionals in Uganda: a discrete choice experiment. *BMC Health Services Research*. 2012;12: 212.
26. Rao KD, Shroff Z, Ramani S, Khandpur N, Murthy S, Hazarika I, et al. How to Attract Health Workers to Rural Areas? Findings from a Discrete Choice Experiment from India. Washington, D.C.: World Bank; 2012.
27. Rao KD. How to attract health workers to rural areas? Findings from a Discrete Choice Experiment in India. *BMC Proceedings*. 2012;6 (suppl 5):O1.
28. Lagarde M, Blaauw D, Cairns J. Cost-effectiveness analysis of human resources policy interventions to address the shortage of nurses in rural South Africa. *Social Science & Medicine*. 2012;75(5):801-806.
29. Miranda JJ, Diez-Canseco F, Lema C, Lescano AG, Lagarde M, Blaauw D, et al. Stated Preferences of Doctors for Choosing a Job in Rural Areas of Peru: A Discrete Choice Experiment. *PLoS ONE*. 2012;7(12):e50567.
30. Huicho L, Miranda JJ, Diez-Canseco F, Lema C, Lescano AG, Lagarde M, et al. Preferences of Nurses and Midwives for Taking Up a Rural Job in Peru: A Discrete Choice Experiment. *PLoS ONE*. 2012;7(12):e50315.
31. Scott A, Witt J, Humphreys J, Joyce C, Kalb G, Jeon S-H, et al. Getting Doctors into the Bush: General Practitioners' Preferences for Rural Location. Melbourne Institute Working Paper Series. Working Paper No. 13/12. Melbourne: University of Melbourne; 2012.
32. Scott A, Witt J, Humphreys J, Joyce C, Kalb G, Jeon S-H, et al. Getting doctors into the bush: General Practitioners' preferences for rural location. *Social Science & Medicine*. 2013;96:33-44.
33. Jaskiewicz W, Phathamavong O, Vangkonevilay P, Paphassarang C, Phachanh IT, Wurts L. Toward Development of a Rural Retention Strategy in Lao People's Democratic Republic: Understanding Health Worker Preferences. Washington, D.C.: *CapacityPlus*; 2012.
34. Rockers P, Jaskiewicz W, Kruk M, Phathamavong O, Vanghonevilay P, Paphassarang C, et al. Differences in preferences for rural job postings between nursing students and practicing nurses: evidence from a discrete choice experiment in Lao People's Democratic Republic. *Human Resources for Health*. 2013;11:22.
35. Ageyi-Baffour P, Rominski S, Nakua E, Gyakobo M, Lori JR. Factors that influence midwifery students in Ghana when deciding where to practice: a discrete choice experiment. *BMC Medical Education*. 2013;13:64.
36. Song K, Scott A, Sivey P, Meng Q. Improving Chinese primary care providers' recruitment and retention: a discrete choice experiment. *Health Policy and Planning*. 2013;doi: 10.1093/heapol/czt098.
